# Supplementary material
Source: PubMed Central journal article supplement (PMC8849550)
Supplement: NIHMS1774139-supplement-1.pdf [file NIHMS1774139-supplement-1.pdf]

# Figure S1

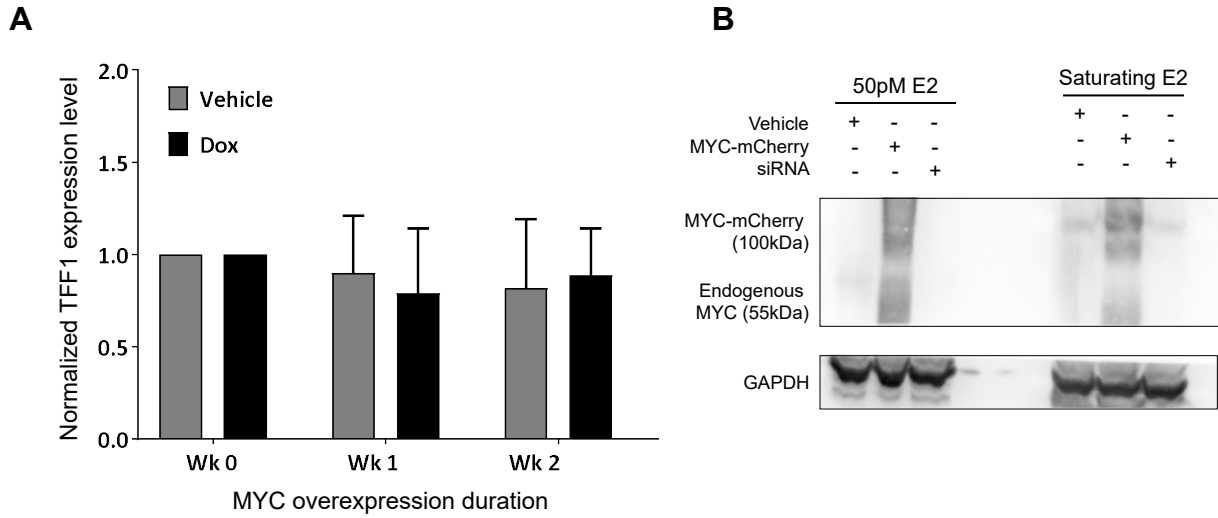

Figure S1. Related to Figure 1.

(A) RT-qPCR quantification of TFF1 expression level in MCF7 cells over a 2-week time course of MYC overexpression with a TetON MYC-EGFP inducible system. Bars represent mean+SD of three biological replicates.

(B) Western blot of MYC perturbed with vehicle, overexpression (MYC-mCherry plasmid) or knockdown (MYC siRNA) in MCF7 cells at 50pM and Saturating E2 levels.

## Figure S2

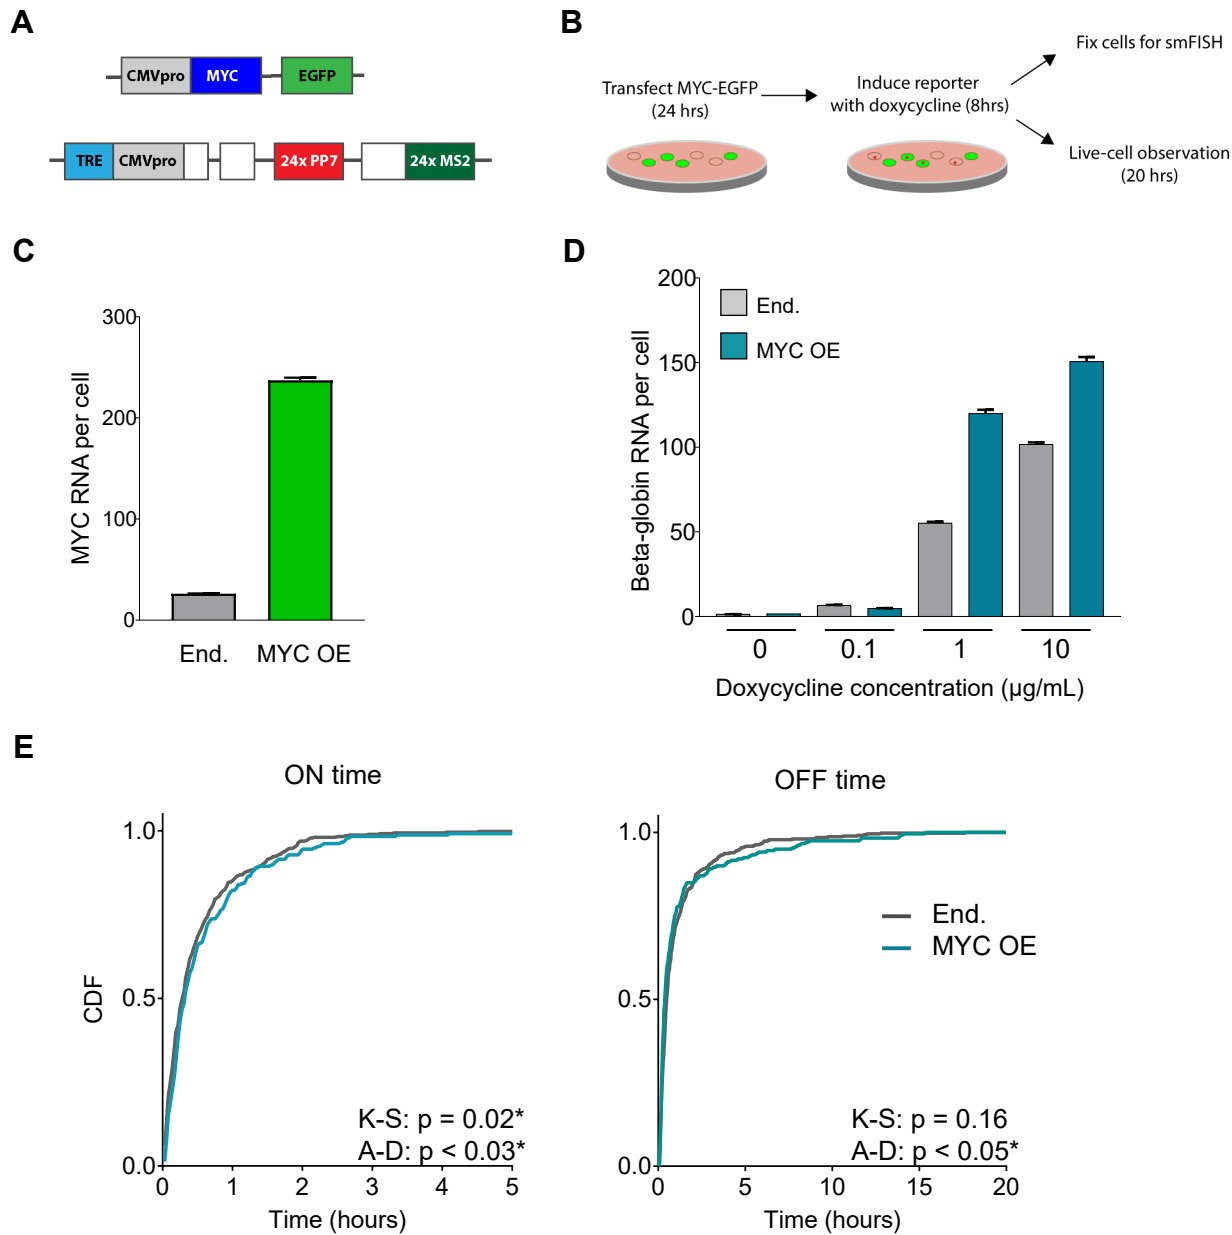

Figure S2. Related to Figure 2.

- (A) Schematic of the TetON beta-globin reporter gene stably integrated in U2OS cells, and the MYC-EGFP transgene added as a plasmid transfection. For live-cell imaging, transcription activity was measured from the PP7 stem loop signal in intron 2 observed by the fluorescence of the interacting PP7-mCherry coat protein.
- (B) Diagram of live-cell and smFISH experimental setup.
- (C) smFISH quantification of MYC RNA per cell with endogenous levels of MYC (End.) and 24 hours MYC-EGFP overexpression (OE).
- (D) smFISH quantification of induced beta-globin reporter expression with endogenous MYC levels or MYC overexpression.
- (E) Normalized CDF of beta-globin reporter ON and OFF times with endogenous MYC levels or 24 hours MYC-EGFP transient overexpression. The beta-globin reporter was induced with 19.5µM doxycycline 6 hours prior to the start of the microscope acquisition period. Statistical significance from the Kolmogorov-Smirnov and Anderson-Darling tests are both reported.

## Figure S3

A

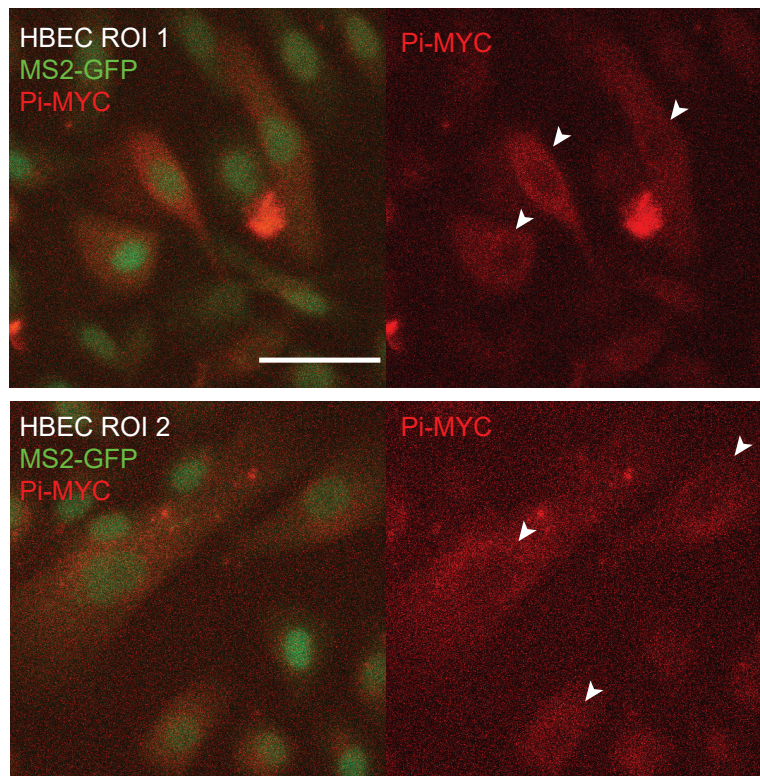

B

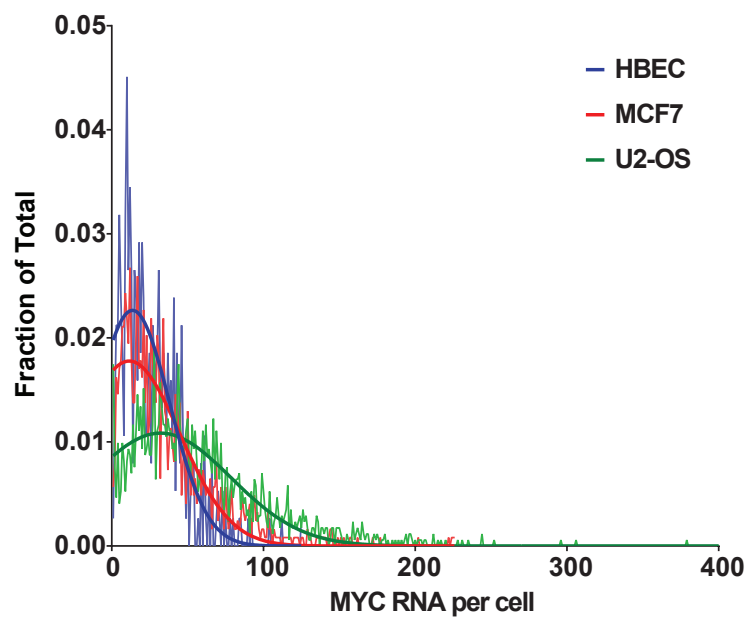

Figure S3. Related to Figure 7.

(A) HBEC cells stably expressing Pi-MYC. Nuclear exclusion in the absence of activating light is indicated by white arrows.

(B) smFISH quantification of endogenous MYC RNA per cell in HBEC (n=125 cells), MCF7 (n=226 cells), and U2OS (n=479 cells). Histograms are fitted to a Gaussian distribution.

# Figure S4

**A**

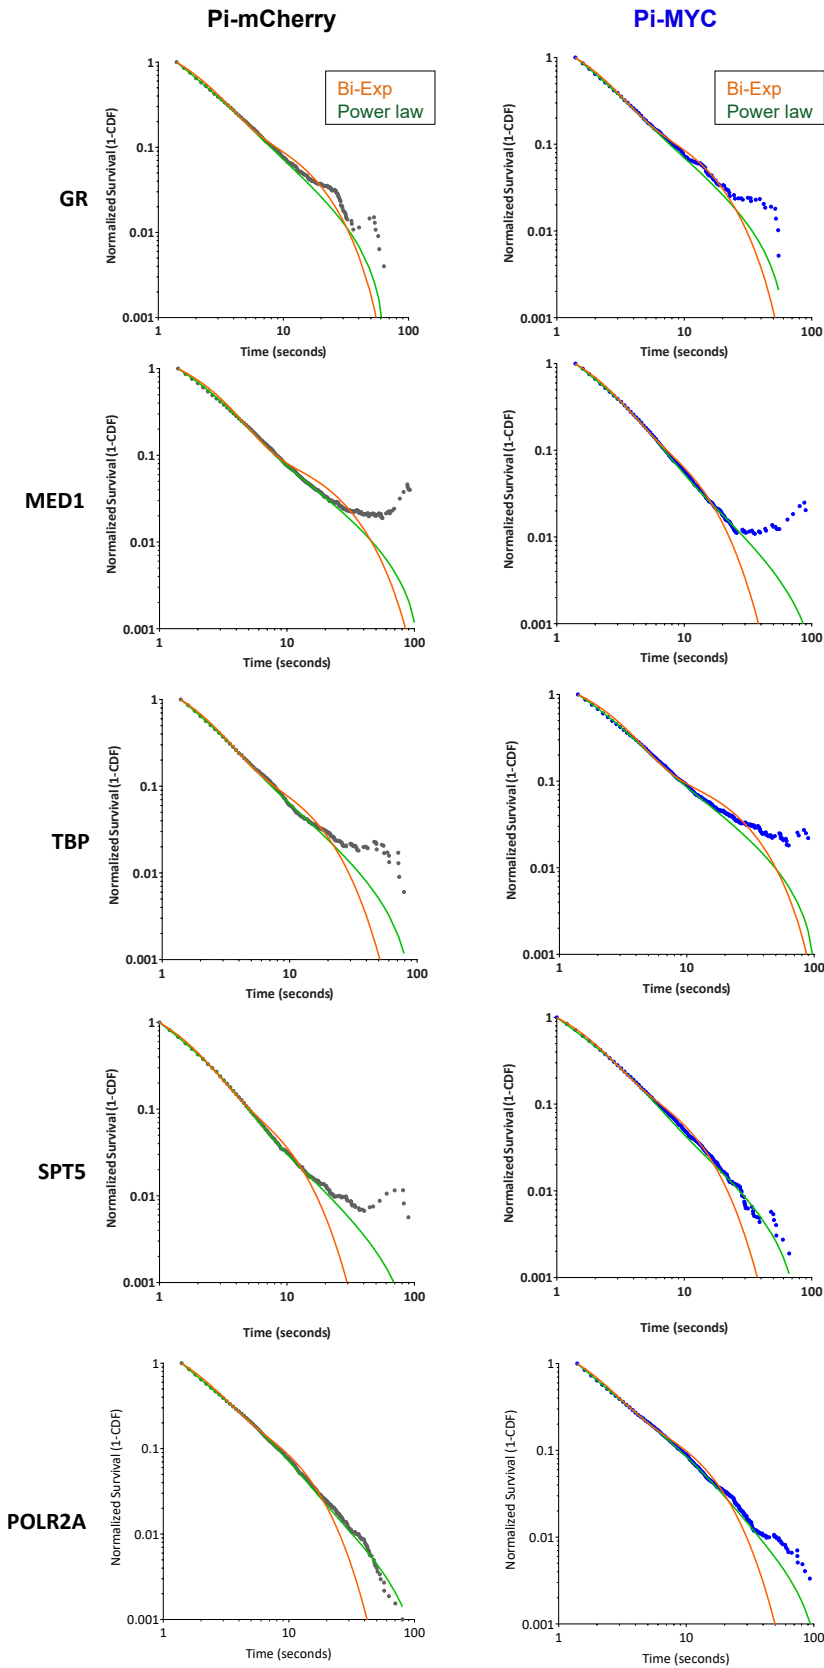

**B**

|                   | BIC Values     |           |
|-------------------|----------------|-----------|
|                   | Bi-exponential | Power Law |
| GR_Pi-mCherry     | 1.523E+06      | 1.099E+05 |
| GR_Pi-MYC         | 1.239E+06      | 4.859E+04 |
| MED1_Pi-mCherry   | 3.435E+07      | 6.032E+06 |
| MED1_Pi-MYC       | 5.208E+07      | 1.897E+06 |
| TBP_Pi-mCherry    | 1.409E+07      | 7.036E+05 |
| TBP_Pi-MYC        | 5.200E+07      | 5.193E+05 |
| SPT5_Pi-mCherry   | 6.679E+07      | 1.133E+06 |
| SPT5_Pi-MYC       | 1.017E+07      | 5.595E+05 |
| POLR2A_Pi-mCherry | 1.985E+07      | 6.348E+05 |
| POLR2A_Pi-MYC     | 3.664E+07      | 1.096E+05 |

Figure S4. Related to Figure 7.

(A) Raw dwell time data in HBEC Pi-mCherry or Pi-MYC expressing cells (gray and blue scatter plots) fit to a bi-exponential (orange) or power law (green) model.

(B) BIC values for each of the conditions fit to a bi-exponential or power law model.

# Figure S5

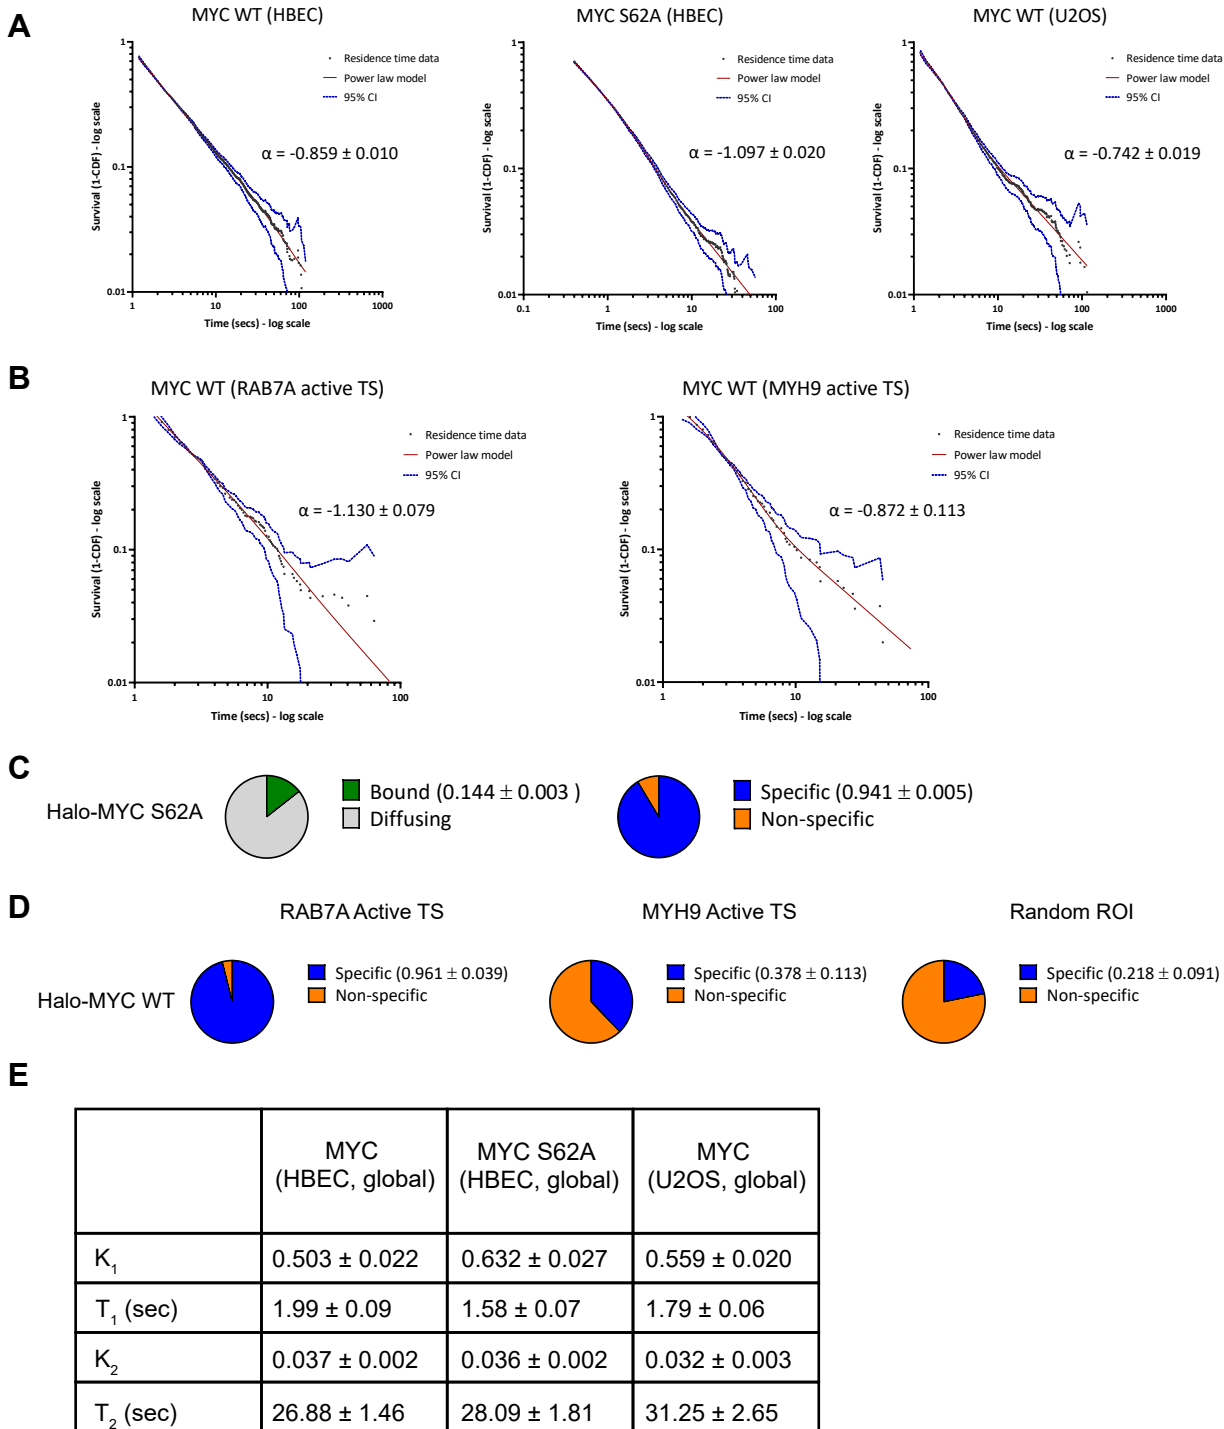

Figure S5. Related to Figure 7.

(A) Survival plot of Halo-MYC and Halo-MYC<sup>S62A</sup> dwell times fit to a power law distribution (red line) with 95% CI displayed (dashed blue line).

(B) As in (B), Survival plot of Halo-MYC dwell times at *RAB7A* and *MYH9* active transcription sites.

(C) Pie charts illustrating the Halo-MYC<sup>S62A</sup> bound/diffusing fraction and specific bound/non-specific bound fraction in HBEC.

(D) Pie charts of the Halo-MYC specific bound/non-specific bound fraction in HBEC at the *RAB7A* active TS, *MYH9* active TS, and at random ROI.

(E) Rates and corresponding mean dwell time values resulting from fitting the data in (A) to a bi-exponential distribution.

Table S2

| MYH9                |                                                                             |       |       |       |              |              |                |
|---------------------|-----------------------------------------------------------------------------|-------|-------|-------|--------------|--------------|----------------|
| Function            | Conventional non-muscle myosin; encoded protein is a myosin IIA heavy chain |       |       |       |              |              |                |
| Transcription Sites |                                                                             |       |       |       |              |              |                |
|                     | veh1                                                                        | veh2  | dox1  | dox2  | veh (ave)    | dox (ave)    | %Δ TS per cell |
| n Cells             | 8695                                                                        | 9866  | 7999  | 6531  | 9280.5       | 7265         |                |
| n TS                | 5798                                                                        | 6414  | 3884  | 2901  | 6106         | 3392.5       |                |
| TS per cell         | 0.667                                                                       | 0.650 | 0.486 | 0.444 | <b>0.658</b> | <b>0.465</b> | <b>0.706</b>   |
| Nascent RNA         |                                                                             |       |       |       |              |              |                |
|                     | veh1                                                                        | veh2  | dox1  | dox2  | veh (ave)    | dox (ave)    | Δ nascent RNA  |
| Mean                | 8.3                                                                         | 8.1   | 7.4   | 7.4   | <b>8.2</b>   | <b>7.4</b>   | <b>-0.8</b>    |
| Median              | 7.3                                                                         | 7.2   | 6.6   | 6.7   | 7.2          | 6.6          |                |
| 75% percentile      | 9.6                                                                         | 9.3   | 8.5   | 8.6   | 9.4          | 8.5          |                |
| SD                  | 3.4                                                                         | 3.3   | 3.0   | 2.6   | 3.4          | 2.8          |                |
| Cellular RNA        |                                                                             |       |       |       |              |              |                |
|                     | veh1                                                                        | veh2  | dox1  | dox2  | veh (ave)    | dox (ave)    | Δ RNA per cell |
| Mean                | 149                                                                         | 132   | 148   | 135   | <b>140.5</b> | <b>141.5</b> | <b>1.0</b>     |
| Median              | 140                                                                         | 125   | 140   | 133   | 132.5        | 136.5        |                |
| 75% percentile      | 184                                                                         | 171   | 180   | 181   | 177.5        | 180.5        |                |
| SD                  | 73                                                                          | 76    | 69    | 79    | 74.5         | 74           |                |

  

| KPNB1               |                                |       |       |       |              |              |                |
|---------------------|--------------------------------|-------|-------|-------|--------------|--------------|----------------|
| Function            | Member of importin beta family |       |       |       |              |              |                |
| Transcription Sites |                                |       |       |       |              |              |                |
|                     | veh1                           | veh2  | dox1  | dox2  | veh (ave)    | dox (ave)    | %Δ TS per cell |
| n Cells             | 4876                           | 3965  | 3436  | 3511  | 4420.5       | 3473.5       |                |
| n TS                | 2398                           | 2133  | 1457  | 1258  | 2265.5       | 1357.5       |                |
| TS per cell         | 0.492                          | 0.538 | 0.424 | 0.358 | <b>0.515</b> | <b>0.391</b> | <b>0.760</b>   |
| Nascent RNA         |                                |       |       |       |              |              |                |
|                     | veh1                           | veh2  | dox1  | dox2  | veh (ave)    | dox (ave)    | Δ nascent RNA  |
| Mean                | 6.0                            | 5.9   | 5.6   | 6.1   | <b>5.9</b>   | <b>5.8</b>   | <b>-0.1</b>    |
| Median              | 5.3                            | 5.1   | 5.0   | 5.4   | 5.2          | 5.2          |                |
| 75% percentile      | 6.5                            | 6.2   | 6.1   | 6.6   | 6.4          | 6.4          |                |
| SD                  | 3.4                            | 4.1   | 2.0   | 2.3   | 3.8          | 2.2          |                |
| Cellular RNA        |                                |       |       |       |              |              |                |
|                     | veh1                           | veh2  | dox1  | dox2  | veh (ave)    | dox (ave)    | Δ RNA per cell |
| Mean                | 101                            | 95    | 72    | 61    | <b>98</b>    | <b>66.5</b>  | <b>-31.5</b>   |
| Median              | 93                             | 89    | 65    | 51    | 91           | 58           |                |
| 75% percentile      | 128                            | 124   | 96    | 86    | 126          | 91           |                |
| SD                  | 58                             | 58    | 47    | 50    | 58           | 48.5         |                |

  

| RAB7A               |                                                                                |       |       |       |              |              |                |
|---------------------|--------------------------------------------------------------------------------|-------|-------|-------|--------------|--------------|----------------|
| Function            | RAB family member; regulates vesicular traffic in late endosomes and lysosomes |       |       |       |              |              |                |
| Transcription Sites |                                                                                |       |       |       |              |              |                |
|                     | veh1                                                                           | veh2  | dox1  | dox2  | veh (ave)    | dox (ave)    | %Δ TS per cell |
| n Cells             | 11562                                                                          | 9540  | 3546  | 4911  | 10551        | 4228.5       |                |
| n TS                | 4007                                                                           | 2318  | 1804  | 2897  | 3162.5       | 2350.5       |                |
| TS per cell         | 0.347                                                                          | 0.243 | 0.509 | 0.590 | <b>0.295</b> | <b>0.549</b> | <b>1.864</b>   |
| Nascent RNA         |                                                                                |       |       |       |              |              |                |
|                     | veh1                                                                           | veh2  | dox1  | dox2  | veh (ave)    | dox (ave)    | Δ nascent RNA  |
| Mean                | 5.5                                                                            | 4.8   | 5.9   | 5.7   | <b>5.2</b>   | <b>5.8</b>   | <b>0.6</b>     |
| Median              | 4.2                                                                            | 3.9   | 4.2   | 4.3   | 4.0          | 4.3          |                |
| 75% percentile      | 5.8                                                                            | 5.0   | 6.6   | 6.1   | 5.4          | 6.3          |                |
| SD                  | 3.7                                                                            | 3.4   | 4.6   | 3.9   | 3.6          | 4.3          |                |
| Cellular RNA        |                                                                                |       |       |       |              |              |                |
|                     | veh1                                                                           | veh2  | dox1  | dox2  | veh (ave)    | dox (ave)    | Δ RNA per cell |
| Mean                | 49                                                                             | 45    | 53    | 59    | <b>47</b>    | <b>56</b>    | <b>9.0</b>     |
| Median              | 46                                                                             | 42    | 49    | 55    | 44           | 52           |                |
| 75% percentile      | 61                                                                             | 59    | 66    | 72    | 60           | 69           |                |
| SD                  | 29                                                                             | 28    | 33    | 35    | 28.5         | 34           |                |

  

| RPAP3               |                                      |       |       |       |              |              |                |
|---------------------|--------------------------------------|-------|-------|-------|--------------|--------------|----------------|
| Function            | RNA polymerase II-associated protein |       |       |       |              |              |                |
| Transcription Sites |                                      |       |       |       |              |              |                |
|                     | veh1                                 | veh2  | dox1  | dox2  | veh (ave)    | dox (ave)    | %Δ TS per cell |
| n Cells             | 9459                                 | 6881  | 5852  | 5955  | 8170         | 5903.5       |                |
| n TS                | 2583                                 | 2110  | 2410  | 1941  | 2346.5       | 2175.5       |                |
| TS per cell         | 0.273                                | 0.307 | 0.412 | 0.326 | <b>0.290</b> | <b>0.369</b> | <b>1.273</b>   |
| Nascent RNA         |                                      |       |       |       |              |              |                |
|                     | veh1                                 | veh2  | dox1  | dox2  | veh (ave)    | dox (ave)    | Δ nascent RNA  |
| Mean                | 3.9                                  | 4.7   | 4.4   | 4.6   | <b>4.3</b>   | <b>4.5</b>   | <b>0.2</b>     |
| Median              | 3.5                                  | 3.7   | 3.9   | 4.0   | 3.6          | 3.9          |                |
| 75% percentile      | 4.3                                  | 4.7   | 4.8   | 5.0   | 4.5          | 4.9          |                |
| SD                  | 1.8                                  | 4.0   | 2.2   | 2.3   | 2.9          | 2.2          |                |
| Cellular RNA        |                                      |       |       |       |              |              |                |
|                     | veh1                                 | veh2  | dox1  | dox2  | veh (ave)    | dox (ave)    | Δ RNA per cell |
| Mean                | 8.1                                  | 8.8   | 13    | 11    | <b>8.45</b>  | <b>12</b>    | <b>3.6</b>     |
| Median              | 7                                    | 8     | 12    | 10    | 7.5          | 11           |                |
| 75% percentile      | 11                                   | 13    | 17    | 15    | 12           | 16           |                |
| SD                  | 5.9                                  | 7.4   | 7.4   | 7.8   | 6.65         | 7.6          |                |

Table S2. Related to Figure 3.

Summary of smFISH RNA quantification measurements.
